1 **Factors associated with unsuppressed viremia in women living with HIV on lifelong ART**  
2 **in a multi-country cohort study: US-PEPFAR PROMOTE study.**

3 Patience Atuhaire<sup>1¶</sup>, Sherika Hanley<sup>2¶</sup>, Nonhlanhla Yende-Zuma<sup>3</sup> Jim Aizire<sup>4</sup>, Lynda Stranix-  
4 Chibanda<sup>5</sup>, Bonus Makanani<sup>6</sup>, Beteniko Milala<sup>7</sup>, Haseena Cassim<sup>8</sup>, Taha Taha<sup>4</sup>; Mary Glenn  
5 Fowler<sup>9</sup>

6 <sup>1</sup>Makerere University-Johns Hopkins University (MU-JHU) Kampala, Uganda

7 <sup>2</sup>*Centre for the AIDS Programme of Research in South Africa (CAPRISA), Umlazi Clinical*  
8 *Research Site, Nelson R. Mandela School of Medicine, Durban, South Africa*

9 <sup>3</sup>*Centre for the AIDS Programme of Research in South Africa (CAPRISA), Durban, South*  
10 *Africa*

11 <sup>4</sup>*Johns Hopkins Bloomberg School of Public Health, Department of Epidemiology, Baltimore,*  
12 *MD, USA*

13 <sup>5</sup>*University of Zimbabwe College of Health Sciences Department of Paediatrics and Child*  
14 *Health*

15 <sup>6</sup>*Malawi College of Medicine-John's Hopkins Research Project*

16 <sup>7</sup>*UNC Project-Malawi*

17 <sup>8</sup>*Perinatal HIV Research Unit (PHRU), Chris Hani Baragwanath Hospital, University of*  
18 *Witwatersrand, Johannesburg, South Africa*

19 <sup>9</sup>*Johns Hopkins University, Departments of Pathology and Epidemiology, Baltimore, MD, USA*  
20

21

22 \* Corresponding author

23 Email: [patuhaire@mujhu.org](mailto:patuhaire@mujhu.org) (PA)

24

25 ¶ These authors contributed equally to this work.

26

27

28

29

30

31

32

33

## 34 Abstract:

35 **Background:** Despite recent efforts to scale-up lifelong combination antiretroviral therapy (cART)  
36 in sub-Saharan Africa, high rates of unsuppressed viremia persist among cART users, and many  
37 countries in the region fall short of the UNAIDS 2020 target to have 90% virally suppressed. We  
38 sought to determine the factors associated with unsuppressed viremia (defined for the purpose  
39 of this study as >200 copies/ml) among African women on lifelong cART.

40 **Methods:** This analysis was based on baseline data of the PROMOTE longitudinal cohort study  
41 at 8 sites in Uganda, Malawi, Zimbabwe and South Africa. The study enrolled 1987 women living  
42 with HIV who initiated lifelong cART at least 1 year previously to assesses long-term safety and  
43 effectiveness of cART. Socio-demographic, clinical, and cART adherence data were collected.  
44 We used multivariable Poisson regression with robust variance to identify factors associated with  
45 unsuppressed viremia.

46 **Results:** At enrolment, 1947/1987 (98%) women reported taking cART. Of these, HIV-1 remained  
47 detectable in 293/1934 (15%), while 216/1934 (11.2%) were considered unsuppressed (>200  
48 copies/ml). The following factors were associated with an increased risk of unsuppressed viremia:  
49 not having household electricity (adjusted prevalence rate ratio (aPRR) 1.74, 95% confidence  
50 interval (CI) 1.28-2.36,  $p < 0.001$ ); self-reported missed cART doses (aPRR 1.63, 95% CI 1.24-  
51 2.13,  $p < 0.001$ ); recent hospitalization (aPRR 2.48, 95% CI 1.28-4.80,  $p = 0.007$ ) and experiencing  
52 abnormal vaginal discharge in the last three months (aPRR 1.88; 95% CI 1.16-3.04,  $p = 0.010$ ).  
53 Longer time on cART (aPRR 0.75, 95% CI 0.64-0.88,  $p < 0.001$ ) and being older (aPRR 0.77, 95%  
54 CI 0.76-0.88,  $p < 0.001$ ) were associated with reduced risk of unsuppressed viremia.

55 **Conclusion:** Socioeconomic barriers such as poverty, not being married, young age, and self-  
56 reported missed doses remain key predictors of unsuppressed viremia. Targeted interventions  
57 are needed to improve cART adherence among women living with HIV with this risk factor profile.

58

59

60

61

## 62 Introduction

63 Since 2012, the rapid scale up of the World Health Organization (WHO) option B+ strategy among  
64 pregnant or breastfeeding women living with Human Immunodeficiency Virus (HIV) has resulted  
65 in a substantial reduction in maternal morbidity and mortality, as well as incident pediatric HIV  
66 infections(1). Subsequently with the introduction of the Universal “Test and Treat” strategy,  
67 approximately 21.7 million people (including women) had access to combination Antiretroviral  
68 Therapy (cART) globally in 2017. Ensuring sustained adherence to and virologic suppression on  
69 cART is paramount in achieving the Joint United Nations Programme on HIV and AIDS (UNAIDS)  
70 90-90-90 2020 Strategy in ending the epidemic by 2030 (2).

71  
72 Barriers to achieving the UNAIDS 2020 strategy regarding the ‘third 90’ persist in sub-Saharan  
73 Africa in part due to suboptimal cART adherence(3). In the absence of viral resistance, HIV viral  
74 load assessment is the proxy for adherence, therefore the contributing factors to both adherence  
75 and viremia may overlap. The most common factors identified as being associated with decreased  
76 adherence include individual factors like younger age below 24 years, forgetting the dosing time,  
77 depression, and substance use. The predominant contextual issue remains stigmatization and  
78 disclosure [3-5]. Other factors such as length of time on ART, education, personal motivation to  
79 start ART, satisfaction with health worker information availed were conducive to adherence [6-8].  
80 Additionally, studies have shown that women who initiate cART for their own health display better  
81 adherence as compared to women who initiate during pregnancy. Even then, adherence to cART  
82 in the post-partum period tends to wane. This may be attributed to less motivation to protect the  
83 child post-delivery and following cessation of breast feeding, as well as a possible break in  
84 transition from postnatal to general HIV care [4, 5].

85 Whereas the scale up of virologic monitoring in sub-Saharan Africa since 2013 has led to the  
86 availability of data regarding factors associated with virologic detectability, there is a paucity of

87 literature as to which factors are most strongly associated with unsuppressed viremia among  
88 African pregnant women and mothers living with HIV. What is known to date is that virological  
89 detectability in resource-limited settings has been associated with the presence of comorbidities  
90 like Tuberculosis or psychiatric disease, higher pretreatment HIV RNA levels, repeat testers after  
91 suspected virologic failure and initiation of cART late in pregnancy(4-9). Thus the purpose of this  
92 analyses is to determine clinical and demographic risk factors associated with unsuppressed  
93 viremia among a well characterized cohort of women living with HIV originally in the PROMISE  
94 clinical trial at the time of their entry into the PROMOTE Study.

95

96 The PROMOTE study is an observational cohort study of mothers with HIV and their children who  
97 had participated in the IMPAACT 1077BF/1077FF PROMISE (Promoting Maternal and Infant  
98 Survival Everywhere) study at high enrolling sites in Zimbabwe, Malawi, Uganda and S. Africa.  
99 The PEPFAR-funded PROMOTE study presents a unique opportunity to assess longer term  
100 treatment outcomes among women randomized in the PROMISE trial to initiate varied  
101 antiretroviral (ARV) regimens during pregnancy for the purpose of preventing perinatal HIV  
102 transmission and subsequently transitioned to lifelong cART following disease progression or in  
103 response to the START study which showed clear benefit of universal ART in June 2015 (10).  
104 The PROMOTE study approach provides data from current public sector HIV care provision mixed  
105 with precise individualized clinical and laboratory data collected under trial settings. The vast  
106 majority of existing studies have assessed factors associated with viremia >1000 copies/ml, the  
107 WHO threshold for treatment failure. Emerging antiretroviral drug resistance has been known to  
108 occur from levels of 200 copies/ml or above, and use of this threshold eliminates most cases of  
109 apparent viremia caused by viral load blips or assay variability. We therefore sought to assess  
110 factors associated with viremia above 200 copies/ml in PROMOTE women at baseline.

111

## 112 **Materials and Methods**

### 113 **Design**

114 The PEPFAR-PROMOTE study is a five-year observational cohort of African women with HIV  
115 and their children previously enrolled in the PROMISE (Promoting Maternal and Infant Survival  
116 Everywhere) randomized trial(11). Commencing three months after the PROMISE trial closed-  
117 out in September 2016, 1987 mothers and their children were recruited from the high enrolling  
118 PROMISE sites. Enrollment to PROMOTE was completed in August 2017. The PROMOTE  
119 study is one of longest ongoing follow up epidemiologic multinational cohorts in sub-Saharan  
120 Africa.

### 121 **Setting and study populations**

122 The PROMOTE study is being conducted at eight research sites in four African countries:  
123 MUJHU/Kampala (Uganda), Blantyre and Lilongwe (Malawi), Harare Family Care, Seke North  
124 and St. Mary's (Zimbabwe), PHRU/Johannesburg and CAPRISA Umlazi/Durban (South Africa).

### 125 **Inclusion criteria**

126 Women and children enrolled in the PROMISE trial from the 8 high enrolling African PROMISE  
127 sites described above, who were willing to provide informed consent to enroll and continue follow-  
128 up in the PROMOTE study.

### 129 **Exclusion criteria**

130 Women who were unwilling to provide informed consent to continue follow-up in the PROMOTE  
131 study; or had plans to relocate permanently out of the catchment area during the cohort study  
132 period; or judged by the site team as having social or other reasons which would make it difficult  
133 for the mother/child pair to comply with study requirements.

## 134 Enrolment study procedures for women

135 Mothers with HIV previously enrolled in the PROMISE study were re-enrolled after appropriate  
136 counseling and consenting in the PROMOTE study. At the enrolment visit, trained study workers  
137 administered sociodemographic and ART adherence questionnaires. A complete medical history  
138 and physical examination, including WHO clinical staging, was performed. Included in a holistic  
139 package of comprehensive counseling was the provision of study-specific antiretroviral  
140 adherence counseling. Enrollment laboratory evaluations included: viral load and CD4+ cell  
141 count. Viral load tests at the different sites are done using the COBAS TaqMan and Abbot assays  
142 with a lower limit of detectability at 20 copies/ml and 40 copies/ml respectively. All questionnaire  
143 responses and laboratory data were completed on designated case report forms (CRFs) by  
144 trained research site personnel. Samples were stored for future HIV drug resistance testing  
145 (blood) and cumulative drug levels testing (hair).

## 146 Ethical considerations

147 The PROMOTE study was approved by all relevant institutional review boards (IRBs) in the U.S.  
148 and participating African research sites/countries. All women provided written informed consent  
149 to enroll and be followed up for the duration of the study with their children and agreed to provide  
150 study samples for protocol lab safety assays, as well as for storage of blood and hair samples.

## 151 Statistical analysis

152 We analyzed baseline data from a multi-country cohort study to estimate the proportion of women  
153 living with HIV who had unsuppressed viremia (defined as viral load above 200 copies/ml) and to  
154 identify predictors of unsuppressed viremia. Fisher's exact, Chi-square test of independence or  
155 Wilcoxon rank sum tests were used to test for an association between baseline characteristics  
156 and unsuppressed viremia. We used multivariable Poisson regression with robust variance to

157 identify the predictors of unsuppressed viremia, and calculated prevalence risk ratios to measure  
158 the strength of an association between baseline characteristics and unsuppressed viremia. This  
159 was done in two ways (i) each predictor was fitted in the model, and (ii) multivariable model with  
160 all the predictors included in the model. Variables included in the multivariable analyses were  
161 chosen based on prior research on risk factors, biological plausibility, and previously identified  
162 clinical associations. Models (i) and (ii) were adjusted for the country variable to account for  
163 variation in geographical location of the research sites. Variables with increased missing data  
164 (>20% of observations missing per variable) and variables that were highly correlated were not  
165 included in the multivariable model. In an exploratory analyses, women with detectable viral loads  
166 were further stratified into the following thresholds (<50, 50-200, 201-1000 and >1000 copies per  
167 ml based on the varied thresholds by various HIV cART committees in resource rich and resource  
168 limited settings)(12, 13) .

## 169 Results

170 Overall, 1987 mothers were enrolled into the PROMOTE study, of whom 1947 (98%) women reported  
171 taking ART at the enrolment visit and HIV-1 viral load results were available for 1934. HIV-1 VL  
172 was above the limit of quantification in 293/1934 (15 %). A total of 216/1934 (11.2%) presented  
173 with an unsuppressed viremia above 200 copies/ml. Furthermore, among the 293 women with  
174 detectable viral load, 24 (8.2%) had VL below 50, 53 (18.1%) had VL between 50 and 200, 50  
175 (17.1%) had VL between 201 and 1000, while 166 (56.7%) had VL above 1000 copies/ml as  
176 displayed in Fig 1.

177 **Fig 1 .The proportions of viral suppression based on different thresholds of detectable**  
178 **viral load.**

179



180 The individual and contextual baseline characteristics of the PROMOTE study have been reported  
 181 elsewhere (11). Table 1 displays baseline characteristics stratified by viral load below and above  
 182 200 copies/ml. With the exception of employment status, HIV status disclosure, condom usage,  
 183 all the baseline variables were associated with unsuppressed viremia >200 copies/ml (Table 1).  
 184 Notably, the prevalence of unsuppressed viremia > 200 copies/ml was the highest (17.5%) in  
 185 Malawi compared to other countries. Of note, 24% of women with recent hospitalization had  
 186 unsuppressed viremia.

187 **Table 1: Individual and contextual baseline characteristics**

| Variable                                                 | Viral load<br>≤200<br>copies/ml<br>(N=1718) | Viral load<br>>200<br>copies/ml<br>(N=216) | p-value |
|----------------------------------------------------------|---------------------------------------------|--------------------------------------------|---------|
| <b>Socioeconomic and demographic factors</b>             |                                             |                                            |         |
| <i>Country, n (%)</i>                                    |                                             |                                            | <.001   |
| Uganda                                                   | 319 (90.6%)                                 | 33 (9.4%)                                  |         |
| Malawi                                                   | 522 (82.5%)                                 | 111 (17.5%)                                |         |
| Zimbabwe                                                 | 406 (90.6%)                                 | 42 (9.4%)                                  |         |
| South Africa                                             | 471 (94.0%)                                 | 30 (6.0%)                                  |         |
| Age (years), median(IQR)                                 | 31 (28 - 35)                                | 29 (25 - 33)                               | <.001   |
| Baseline CD4 cell count (cells/μL), median (IQR)         | 852(674-1064)                               | 615(472-810)                               | <0.001  |
| <i>Marital status, n(%)</i>                              |                                             |                                            | 0.003   |
| Other (single, divorced, widowed, separated)             | 325 (84.4%)                                 | 60 (15.6%)                                 |         |
| Married/regular partner                                  | 1393 (89.9%)                                | 156 (10.1%)                                |         |
| <i>Employment, n(%)<sup>a</sup></i>                      |                                             |                                            | 0.076   |
| Formal employment                                        | 383 (90.5%)                                 | 40 (9.5%)                                  |         |
| Self-employment (small business)                         | 532 (86.5%)                                 | 83 (13.5%)                                 |         |
| Not employed/housewife                                   | 802 (89.7%)                                 | 92 (10.3%)                                 |         |
| <i>Highest level of education, n(%)</i>                  |                                             |                                            | 0.011   |
| Secondary school completed or tertiary education         | 1227 (90.0%)                                | 136 (10.0%)                                |         |
| Electricity in the premises, n(%)                        | 1209 (91.8%)                                | 108 (8.2%)                                 | <.001   |
| <i>Tap water in the premises, n(%)</i>                   | 1139 (90.4%)                                | 121 (9.6%)                                 | 0.004   |
| <i>Travel time from home to clinic, n(%)<sup>b</sup></i> |                                             |                                            | 0.044   |
| Less than 30 minutes                                     | 444 (92.3%)                                 | 37 (7.7%)                                  |         |
| 30-60 minutes                                            | 757 (87.7%)                                 | 106 (12.3%)                                |         |
| 1-2 hours                                                | 389 (87.2%)                                 | 57 (12.8%)                                 |         |
| Greater than 2 hours                                     | 127 (88.8%)                                 | 16 (11.2%)                                 |         |

| Variable                                                                                                                                                                                                                                                                                                               | Viral load<br>≤200<br>copies/ml<br>(N=1718) | Viral load<br>>200<br>copies/ml<br>(N=216) | p-value |
|------------------------------------------------------------------------------------------------------------------------------------------------------------------------------------------------------------------------------------------------------------------------------------------------------------------------|---------------------------------------------|--------------------------------------------|---------|
| <i>Disclosed HIV status to partner, n(%)<sup>c</sup></i>                                                                                                                                                                                                                                                               |                                             |                                            | 0.465   |
| Disclosed to partner                                                                                                                                                                                                                                                                                                   | 1201 (90.2%)                                | 131 (9.8%)                                 |         |
| No disclosure                                                                                                                                                                                                                                                                                                          | 192 (88.5%)                                 | 25 (11.5%)                                 |         |
| <i>Partner's HIV status<sup>d</sup></i>                                                                                                                                                                                                                                                                                |                                             |                                            |         |
| Positive                                                                                                                                                                                                                                                                                                               | 724 (90.2%)                                 | 79 (9.8%)                                  | 0.908   |
| Negative                                                                                                                                                                                                                                                                                                               | 257 (89.9%)                                 | 29 (10.1%)                                 |         |
| <i>Condom usage during sex in last 3 months, n(%)<sup>e</sup></i>                                                                                                                                                                                                                                                      |                                             |                                            | 0.811   |
| Always                                                                                                                                                                                                                                                                                                                 | 502 (89.8%)                                 | 57 (10.2%)                                 |         |
| Sometimes                                                                                                                                                                                                                                                                                                              | 506 (88.6%)                                 | 65 (11.4%)                                 |         |
| Never                                                                                                                                                                                                                                                                                                                  | 265 (88.9%)                                 | 33 (11.1%)                                 |         |
| <i>Years on ART, median(IQR)</i>                                                                                                                                                                                                                                                                                       | 2 (1 - 2)                                   | 1 (1 - 2)                                  | <.001   |
| <b>Clinical factors</b>                                                                                                                                                                                                                                                                                                |                                             |                                            |         |
| Admitted to hospital in the past 3 months, n(%)                                                                                                                                                                                                                                                                        |                                             |                                            |         |
| Yes                                                                                                                                                                                                                                                                                                                    | 22 (75.9%)                                  | 7 (24.1%)                                  | 0.036   |
| No                                                                                                                                                                                                                                                                                                                     | 1696 (89.0%)                                | 209 (11.0%)                                |         |
| Received TB treatment in the last 3 months, n(%)                                                                                                                                                                                                                                                                       |                                             |                                            |         |
| Yes                                                                                                                                                                                                                                                                                                                    | 8 (88.9%)                                   | 1 (11.1%)                                  | 1.00    |
| No                                                                                                                                                                                                                                                                                                                     | 1710 (88.8%)                                | 215 (11.2%)                                |         |
| Presence of abnormal vaginal discharge in the last 3 months, n (%)                                                                                                                                                                                                                                                     |                                             |                                            |         |
| Yes                                                                                                                                                                                                                                                                                                                    | 80 (82.5%)                                  | 17 (17.5%)                                 | 0.047   |
| No                                                                                                                                                                                                                                                                                                                     | 1638 (89.2%)                                | 199 (10.8%)                                |         |
| Currently breastfeeding, n(%) <sup>b</sup>                                                                                                                                                                                                                                                                             |                                             |                                            |         |
| Yes                                                                                                                                                                                                                                                                                                                    | 163 (84.9%)                                 | 29 (15.1%)                                 | 0.071   |
| No                                                                                                                                                                                                                                                                                                                     | 1554 (89.3%)                                | 187 (10.7%)                                |         |
| <b>ART related factors</b>                                                                                                                                                                                                                                                                                             |                                             |                                            |         |
| Never missed any doses since last visit, n(%) <sup>f</sup>                                                                                                                                                                                                                                                             | 1257 (91.8%)                                | 113 (8.2%)                                 | <.001   |
| Number of days ARV doses missed in last four days, n(%) <sup>f</sup>                                                                                                                                                                                                                                                   |                                             |                                            |         |
| None                                                                                                                                                                                                                                                                                                                   | 1638 (90.6%)                                | 169 (9.4%)                                 | <.001   |
| Awareness of dosing instructions, n(%) <sup>f</sup>                                                                                                                                                                                                                                                                    |                                             |                                            |         |
| Yes                                                                                                                                                                                                                                                                                                                    | 826 (87.9%)                                 | 114 (12.1%)                                | 0.017   |
| No                                                                                                                                                                                                                                                                                                                     | 842 (90.3%)                                 | 90 (9.7%)                                  |         |
| <sup>a</sup> 2 missing data, <sup>b</sup> 1 missing data, <sup>c</sup> amongst 1549 women with partners, <sup>d</sup> amongst women whom their partner's got tested and women knew their HIV status, <sup>e</sup> amongst women who report sexual activities, <sup>f</sup> amongst those who were on ART at enrollment |                                             |                                            |         |

189 The predictors of detectable viremia > 200cp/ml are shown in Table 2. Recent hospital admission  
 190 and experiencing abnormal vaginal discharge in the last three months were associated with a 2.5-  
 191 fold and almost 2-fold higher risk of detectable viremia respectively (adjusted prevalence risk ratio  
 192 (aPRR) 2.48, 95% confidence interval (CI) 1.28-4.80, p=0.007; aPRR 1.88; 95% CI 1.16-3.04,  
 193 p=0.010). In addition, the absence of socioeconomic factors such as electricity in the premises  
 194 was associated with a 74% higher risk of detectable viremia (aPRR 1.74, 95% CI 1.28-2.36,  
 195 p<0.001). Women who missed some of their ART doses were more likely to present with  
 196 detectable viremia (aPRR 1.63, 95% CI 1.24-2.13, p<0.001). The most common reason for  
 197 missing ART dosing was travelling without sufficient ARV supply and simply forgetting (Fig 2).  
 198 Longer exposure to ART (aPRR: 0.75, 95% CI 0.64-0.88), p<0.001) and being older (aPRR 0.77,  
 199 95% CI 0.76-0.88, p<0.001) were associated with lower risk of detectable viremia. Other variables  
 200 associated but not statistically significant variables included: being either single, divorced,  
 201 widowed or separated (aPRR 1.32, 95% CI 0.99-1.78, p=0.061); secondary school level  
 202 completion (aPRR 1.17, 95% CI 0.85-1.61, p=0.326); travel time from the cART clinic of 1 hour  
 203 or more (aPRR 0.88, 95% CI 0.66-1.91, p=0.417) and being aware of antiretroviral (ARV)  
 204 medication dosing instructions (aPRR 1.08, 0.81-1.43, p=0.612). Despite 11% of women not  
 205 disclosing their HIV status to their male partners, this variable was not significantly associated  
 206 with detectable viremia. Additionally, about 10% (n=29) of women with unsuppressed viremia had an  
 207 HIV-uninfected partner.

208  
 209

210 **Table 2: Factors associated with detectable viral load >200 copies/ml**

| Variable                                      | Multivariable <sup>1</sup> |         | Multivariable <sup>2</sup> |         |
|-----------------------------------------------|----------------------------|---------|----------------------------|---------|
|                                               | RR (95% CI)                | p-value | aRR (95% CI)               | p-value |
| Age (5-year increase)                         | 0.77 (0.67-0.88 )          | <.001   | 0.77 (0.67-0.88)           | <.001   |
| Marital status (ref: married/regular partner) |                            |         |                            |         |

|                                                                                                                                    |                  |       |                  |       |
|------------------------------------------------------------------------------------------------------------------------------------|------------------|-------|------------------|-------|
| Other (single, divorced, widowed, separated)                                                                                       | 1.55 (1.19-2.04) | 0.001 | 1.32 (0.99-1.78) | 0.061 |
| Employment (ref: formal employment)                                                                                                |                  |       |                  |       |
| Not employed                                                                                                                       | 0.92 (0.65-1.32) | 0.655 | 0.84 (0.58-1.21) | 0.349 |
| Self employed                                                                                                                      | 1.09 (0.75-1.58) | 0.646 | 1.11 (0.76-1.63) | 0.577 |
| Education (ref: secondary school not complete)                                                                                     |                  |       |                  |       |
| Secondary school complete                                                                                                          | 1.04 (0.78-1.38) | 0.806 | 1.17 (0.85-1.61) | 0.326 |
| Electricity in the premises (ref: Yes)                                                                                             |                  |       |                  |       |
| No                                                                                                                                 | 1.62 (1.22-2.14) | <.001 | 1.74 (1.28-2.36) | <.001 |
| Tap water in the premises (ref: Yes)                                                                                               |                  |       |                  |       |
| No                                                                                                                                 | 1.24 (0.96-1.62) | 0.103 | -                | -     |
| Travel time to clinic from home (ref: less than 1 hour)                                                                            |                  |       |                  |       |
| 1 hour or more                                                                                                                     | 1.01 (0.77-1.33) | 0.936 | 0.88 (0.66-1.19) | 0.417 |
| Condom use during sex in last three months (ref: Never)                                                                            |                  |       |                  |       |
| Always                                                                                                                             | 1.12 (0.74-1.72) | 0.585 | -                | -     |
| Sometimes                                                                                                                          | 1.05 (0.71-1.56) | 0.811 | -                | -     |
| HIV status disclosure to partner (ref=Yes)                                                                                         |                  |       |                  |       |
| No                                                                                                                                 | 1.45 (0.94-2.25) | 0.096 | -                | -     |
| Abnormal vaginal discharge in last three months (ref: No)                                                                          |                  |       |                  |       |
| Yes                                                                                                                                | 2.12 (1.32-3.39) | 0.002 | 1.88 (1.16-3.04) | 0.010 |
| Hospital admission in last three months (ref: No)                                                                                  |                  |       |                  |       |
| Yes                                                                                                                                | 2.29 (1.20-4.36) | 0.012 | 2.48 (1.28-4.80) | 0.007 |
| Aware of ARV medication dosing instructions (ref: No)                                                                              |                  |       |                  |       |
| Yes                                                                                                                                | 1.05 (0.79-1.41) | 0.723 | 1.08 (0.81-1.43) | 0.612 |
| Missed ART doses since last visit (ref: None)                                                                                      |                  |       |                  |       |
| Missed some doses                                                                                                                  | 2.01 (1.55-2.60) | <.001 | 1.63 (1.24-2.13) | <.001 |
| Time since ART initiation (per 1-year increase)                                                                                    | 0.68 (0.57-0.81) | <.001 | 0.75 (0.64-0.88) | <.001 |
| <sup>1</sup> Each predictor fitted separately while adjusted for the country <sup>2</sup> Multivariable model with many predictors |                  |       |                  |       |

211

212 **Fig 2. Reasons for missing ART dose**

## 213 Discussion

214 We found that 11% of the 1934 women initiated on antiretroviral treatment had unsuppressed  
 215 viremia as defined for the purposes of this study as >200 copies/ml. This is slightly above the  
 216 UNAIDS 10% target bearing in mind that the 200 copies/ml threshold is lower than the 1000

217 copies threshold used by UNAIDS. We identify sociodemographic, self-reported non-adherence,  
218 and clinical factors that were associated with detectable viremia > 200copies/ml.

219

220 The higher proportion of women with detectable viremia than the UNAIDS target suggests that  
221 challenges to achieving the 3<sup>rd</sup> '90' still persist even among women who are in an ideal setting  
222 (research) compared to the programs in resource limited settings(3). The association between  
223 sociodemographic factors namely the absence of household electricity, a proxy for lower  
224 economic status, and detectable viremia above 200 copies/ml, were consistent with other  
225 literature that has highlighted that sociodemographic factors are key predictors to poor adherence  
226 despite one being on cART(5, 14). The association between younger age and unsuppressed  
227 viremia is consistent with current literature (3, 4). Additionally, longer duration of cART use as  
228 protective of unsuppressed viremia is consistent with this observation. In contrast to other  
229 literature, we found that employment, education and travel time to the clinic were not significantly  
230 correlated with viral suppression in the PROMOTE cohort at baseline in the multivariate  
231 analyses(14).

232

233 Based on self-reported adherence reports using the study questionnaire, we found that self-  
234 reported missed ART doses was significantly associated with unsuppressed viremia. Even though  
235 there is uncertainty regarding the reliability of self-reported adherence, this measure of  
236 adherence still remains as a cheap and easily determined mode of adherence monitoring in  
237 resource limited settings using appropriate tools(5). We noted however that a small proportion of  
238 women (9.7%) were not aware of the dosing instructions. This factor was not a significant predictor  
239 of viral detectability. This finding may suggest that patient education is still lacking. Effective  
240 interventions like motivational adherence counseling ensure two-way input and steers away from  
241 the traditional methods of adherence counselling(3).

242

243 The most common reason for missed doses was travelling with insufficient ARV supply and  
244 forgetting, which are in line with other literature(14). Re-emphasis on simple measures for  
245 example, setting an alarm (eg mobile phone alarm) and linking dosing with daily activities, should  
246 be part and parcel of adherence counseling. Provision of a pillbox is a tool used by participating  
247 South African sites. Traveling without ARV supply as a reason could fall in the “forgetting”  
248 category, or could be a cover for non-disclosure while visiting family homes. The reason of no  
249 privacy, be it at work or in home, also implies non -disclosure and feared stigmatization.. Of note,  
250 condom use was not associated with viral detectability above 200 copies/ml.

251

252 Relatedly, 11% of all the women had not disclosed their HIV status to their primary partner but  
253 this was not predictive of detectable viremia. This PROMOTE result is contrary to results of other  
254 studies citing non-disclosure as being associated with poor adherence in different HIV infected  
255 populations(14). Contextual issues however remain a major underlying contributor to detectable  
256 viremia and patients may not be forthcoming with these reasons for a missed dose. In  
257 hyperendemic settings with advanced HIV outreach programmes, one would expect less  
258 disclosure issues and united communities taking treatment together, however inherent  
259 characteristics prevent effectiveness of the existing adherence promotion programmes.

260

261 Other participants provided reasons as being too busy and running out of treatment prior to visit.  
262 This is commonly due to life’s every day demands including work commitments. Countries are  
263 now working towards improving the access to medicines by means of decentralized dispensing  
264 for convenient pill collection. South Africa has implemented a new model where the dispensing  
265 services are contracted to private pharmacies(15). Other means of differentiated care strategies  
266 to ensure patient convenience include multi-month prescriptions, fast-track refills and community  
267 adherence groups who assist with collection and distribution of cART as done in Malawi, Uganda  
268 and Zimbabwe(3, 16).

269

270 Whereas adherence barriers like fear of side effects, pill burden, perceptions that ART is harmful,  
271 feeling sick and depressed have been associated with virologic detectability in various AIDS  
272 Clinical Trial Participants in United States, current first-line cART comprises low pill burden and  
273 improved safety profile with low toxicity(17). The aim of the health system and its providers is to  
274 ensure adherence to first-line cART regimens to prevent the need for second- and third-line cART  
275 which are more toxic and have greater pill burden.

276 More so, some clinical factors like recent hospitalization and abnormal vaginal discharge were  
277 significantly associated with viral detectability. Recent hospitalization may suggest clinical failure  
278 in this subgroup of non-suppressed women. About 17% of those with detectable viremia had low  
279 level viremia of 200 to 999 copies/ml. Other studies have shown that persistent viremia above  
280 200 copies/ml is associated with a higher risk of virologic failure, mortality and morbidity especially  
281 among cases of delayed ART switch to 2nd line therapy (18, 19). In addition, 15% of the non-  
282 suppressed women were breastfeeding babies born after the PROMISE index child. This alludes  
283 to significant adherence challenges which often arise during the postpartum period and  
284 beyond(20).

285

286 This study contributes much needed data regarding the factors associated with unsuppressed  
287 viremia among African pregnant and breastfeeding women receiving ART treatment for life; more  
288 so because viral load testing is only a fairly recent intervention in HIV treatment monitoring. These  
289 data demonstrate that socioeconomic barriers remain key predictors of viral detectability, as well  
290 as recent hospitalization and recent abnormal vaginal discharge.

291

292 The strengths in these analyses include that PROMOTE is one of the largest current longitudinal  
293 cohort studies of HIV infected women of child bearing age in Africa; and is being conducted in

294 multiple sites in East and Southern Africa, which increases the generalizability of the findings. In  
295 addition, there is ongoing Quality Assurance and monitoring as part of the study. Relative  
296 limitations to the analyses are that this is a baseline cross sectional analysis; and that data on  
297 resistance are not currently available.

## 298 Future plans for the study

299 Follow up trends in viral load and adherence data over the 5 year follow up in PROMOTE will be  
300 presented when available; as will the relation of hair drug levels and drug resistance testing  
301 correlates. Point-of-care VL testing coupled with motivation adherence counseling and adherence  
302 risk assessment tool development are in the process of being implemented at the sites in  
303 Zimbabwe and Uganda respectively.

## 304 Conclusion

305 This baseline analysis of the PROMOTE study set out to evaluate what clinical and socioeconomic  
306 factors were associated with a detectable viremia of >200 copies/mL in African mothers on lifelong  
307 cART. Baseline data demonstrate that socioeconomic barriers such as poverty, not being married,  
308 young age, and prior history of missing pill doses remain key predictors of viral detectability. This  
309 study supports the use of self-reported adherence to cART in the absence of superior adherence  
310 measures. The most common reasons given by mothers for missing cART doses emphasize the  
311 need for effective motivational adherence counseling, empowering women to improve adherence  
312 by using simple reminders and a differentiated care model tailored to mother's needs. The  
313 PROMOTE study insights provide opportunities for possible development and improvement of  
314 targeted /cost effective implementation strategies to help support lifetime maternal adherence to  
315 both cART and HIV care .

316



## 317 Disclaimer

318 The findings and conclusions reported herein are those of the author(s) and do not necessarily  
319 reflect the official position of the U.S. government.

320

## 321 Acknowledgments

322 We thank the women and children who are participating in the PROMOTE study at each of the  
323 research sites. We acknowledge the research teams at each of the following sites: MUJHU,  
324 Kampala, Uganda; UNC Project Clinical Research Site, Lilongwe, Malawi; Johns Hopkins-  
325 College of Medicine Research Project, Blantyre, Malawi; University of Zimbabwe College of  
326 Health Sciences Clinical Trials Research Centre (UZCHS-CTRC) Zimbabwe; Perinatal HIV  
327 Research Unit (PHRU), Soweto, South Africa; Centre for the AIDS Programme of Research in  
328 South Africa (CAPRISA), uMlazi Clinical Research Site, Durban, South Africa.

329

## 330 REFERENCES

- 331 1. WHO. Consolidated guidelines on the use of antiretroviral drugs for treating and preventing HIV  
332 infection: recommendations for a public health approach: World Health Organization; 2016.
- 333 2. UNAIDS. Global HIV/AIDS statistics facts sheet: UNAIDS; 2018 [
- 334 3. Haberer JE, Sabin L, Amico KR, Orrell C, Galárraga O, Tsai AC, et al. Improving antiretroviral  
335 therapy adherence in resource-limited settings at scale: a discussion of interventions and  
336 recommendations. *Journal of the International AIDS Society*. 2017;20(1):21371.
- 337 4. Bulage L, Ssewanyana I, Nankabirwa V, Nsubuga F, Kihembo C, Pande G, et al. Factors associated  
338 with virological non-suppression among HIV-positive patients on antiretroviral therapy in Uganda,  
339 August 2014–July 2015. *BMC infectious diseases*. 2017;17(1):326.
- 340 5. Corless IB, Hoyt AJ, Tyler-Viola L, Sefcik E, Kemppainen J, Holzemer WL, et al. 90-90-90-Plus:  
341 Maintaining Adherence to Antiretroviral Therapies. *AIDS Patient Care and STDs*. 2017;31(5):227-36.
- 342 6. Hoffmann CJ, Cohn S, Mashabela F, Hoffmann JD, McIlleron H, Denti P, et al. Treatment failure,  
343 drug resistance, and CD4 T-cell count decline among postpartum women on antiretroviral therapy in  
344 South Africa. *Journal of acquired immune deficiency syndromes (1999)*. 2016;71(1):31.
- 345 7. Katz IT, Leister E, Kacanek D, Hughes MD, Bardeguez A, Livingston E, et al. Factors associated  
346 with lack of viral suppression at delivery among highly active antiretroviral therapy-naive women with  
347 HIV: a cohort study. *Annals of internal medicine*. 2015;162(2):90-9.
- 348 8. Myer L, Dunning L, Lesosky M, Hsiao NY, Phillips T, Petro G, et al. Frequency of Viremic Episodes  
349 in HIV-Infected Women Initiating Antiretroviral Therapy During Pregnancy: A Cohort Study. *Clinical*  
350 *infectious diseases : an official publication of the Infectious Diseases Society of America*. 2017;64(4):422-  
351 7.

- 352 9. Labhardt ND, Ringera I, Lejone TI, Cheleboi M, Wagner S, Muhairwe J, et al. When patients fail  
353 UNAIDS' last 90 - the "failure cascade" beyond 90-90-90 in rural Lesotho, Southern Africa: a prospective  
354 cohort study. *Journal of the International AIDS Society*. 2017;20(1):21803.
- 355 10. Group ISS. Initiation of antiretroviral therapy in early asymptomatic HIV infection. *New England*  
356 *Journal of Medicine*. 2015;373(9):795-807.
- 357 11. Taha TE, Yende-Zuma N, Aizire J, Chipato T, Wambuzi Ogwang L, Makanani B, et al. The multi-  
358 country PROMOTE HIV antiretroviral treatment observational cohort in Sub-Saharan Africa: Objectives,  
359 design, and baseline findings. *PloS one*. 2018;13(12):e0208805.
- 360 12. Department of Health and Human Services: Panel on Antiretroviral Guidelines for Adults and  
361 Adolescents. Guidelines for the Use of Antiretroviral Agents in Adults and Adolescents Living with HIV.  
362 Available at <http://www.aidsinfo.nih.gov/ContentFiles/AdultandAdolescentGL.pdf>. Access date 13 Mar  
363 2019,Page C-7.
- 364 13. EACS European AIDS Clinical Society. Guidelines for the Clinical Management and Treatment of  
365 HIV Infected Adults in Europe Version 8.0 October 2015.
- 366 14. Shubber Z, Mills EJ, Nachega JB, Vreeman R, Freitas M, Bock P, et al. Patient-Reported Barriers  
367 to Adherence to Antiretroviral Therapy: A Systematic Review and Meta-Analysis. *PLOS Medicine*.  
368 2016;13(11):e1002183.
- 369 15. Magadzire BP, Marchal B, Mathys T, Laing RO, Ward K. Analyzing implementation dynamics  
370 using theory-driven evaluation principles: lessons learnt from a South African centralized chronic  
371 dispensing model. *BMC health services research*. 2017;17(2):724.
- 372 16. Prust ML, Banda CK, Nyirenda R, Chimbwandira F, Kalua T, Jahn A, et al. Multi-month  
373 prescriptions, fast-track refills, and community ART groups: results from a process evaluation in Malawi  
374 on using differentiated models of care to achieve national HIV treatment goals. *Journal of the*  
375 *International AIDS Society*. 2017;20:21650.
- 376 17. Saberi P, Neilands TB, Vittinghoff E, Johnson MO, Chesney M, Cohn SE. Barriers to antiretroviral  
377 therapy adherence and plasma HIV RNA suppression among AIDS clinical trials group study participants.  
378 *AIDS patient care and STDs*. 2015;29(3):111-6.
- 379 18. Esber A, Polyak C, Kiweewa F, Maswai J, Owuoth J, Maganga L, et al. Persistent low level viremia  
380 predicts subsequent virologic failure. Is it time to change the 3rd 90? *Clinical Infectious Diseases*. 2018.
- 381 19. Elvstam O, Medstrand P, Yilmaz A, Isberg PE, Gisslen M, Bjorkman P. Virological failure and all-  
382 cause mortality in HIV-positive adults with low-level viremia during antiretroviral treatment. *PloS one*.  
383 2017;12(7):e0180761.
- 384 20. Nachega JB, Uthman OA, Anderson J, Peltzer K, Wampold S, Cotton MF, et al. Adherence to  
385 antiretroviral therapy during and after pregnancy in low-, middle and high income countries: a  
386 systematic review and meta-analysis. *AIDS (London, England)*. 2012;26(16):2039.

387

## 388 Supporting information

389

### 390 **S1 Manuscript data**

### 391 **S2 Variable name and label**

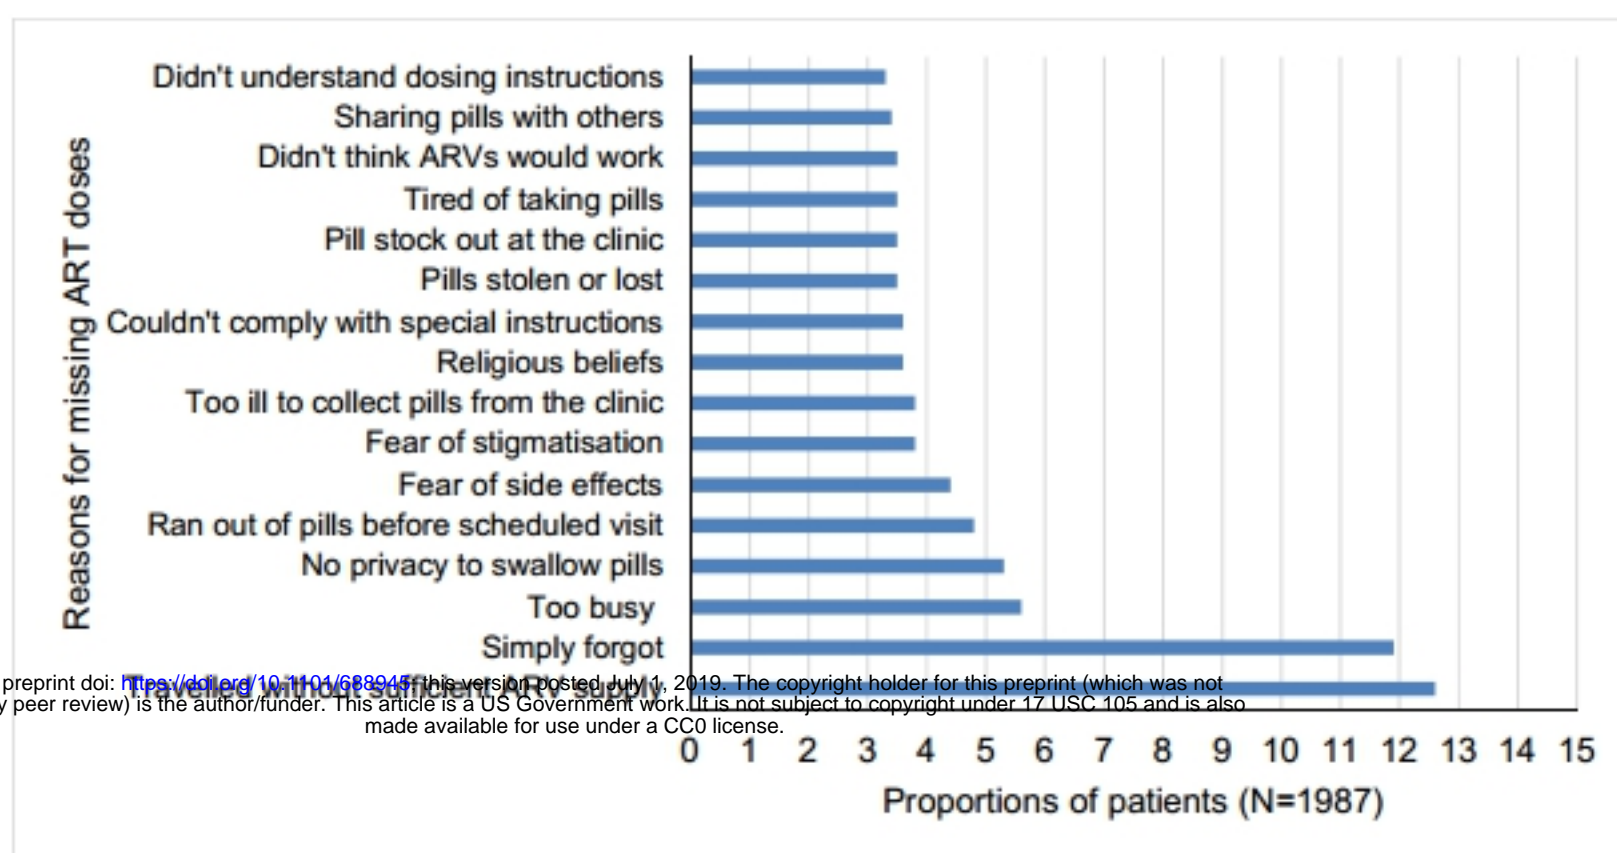

Fig 2.Reasons of missing ART dose

bioRxiv preprint doi: <https://doi.org/10.1101/608945>; this version posted July 1, 2019. The copyright holder for this preprint (which was not certified by peer review) is the author/funder. This article is a US Government work. It is not subject to copyright under 17 USC 105 and is also made available for use under a CC0 license.

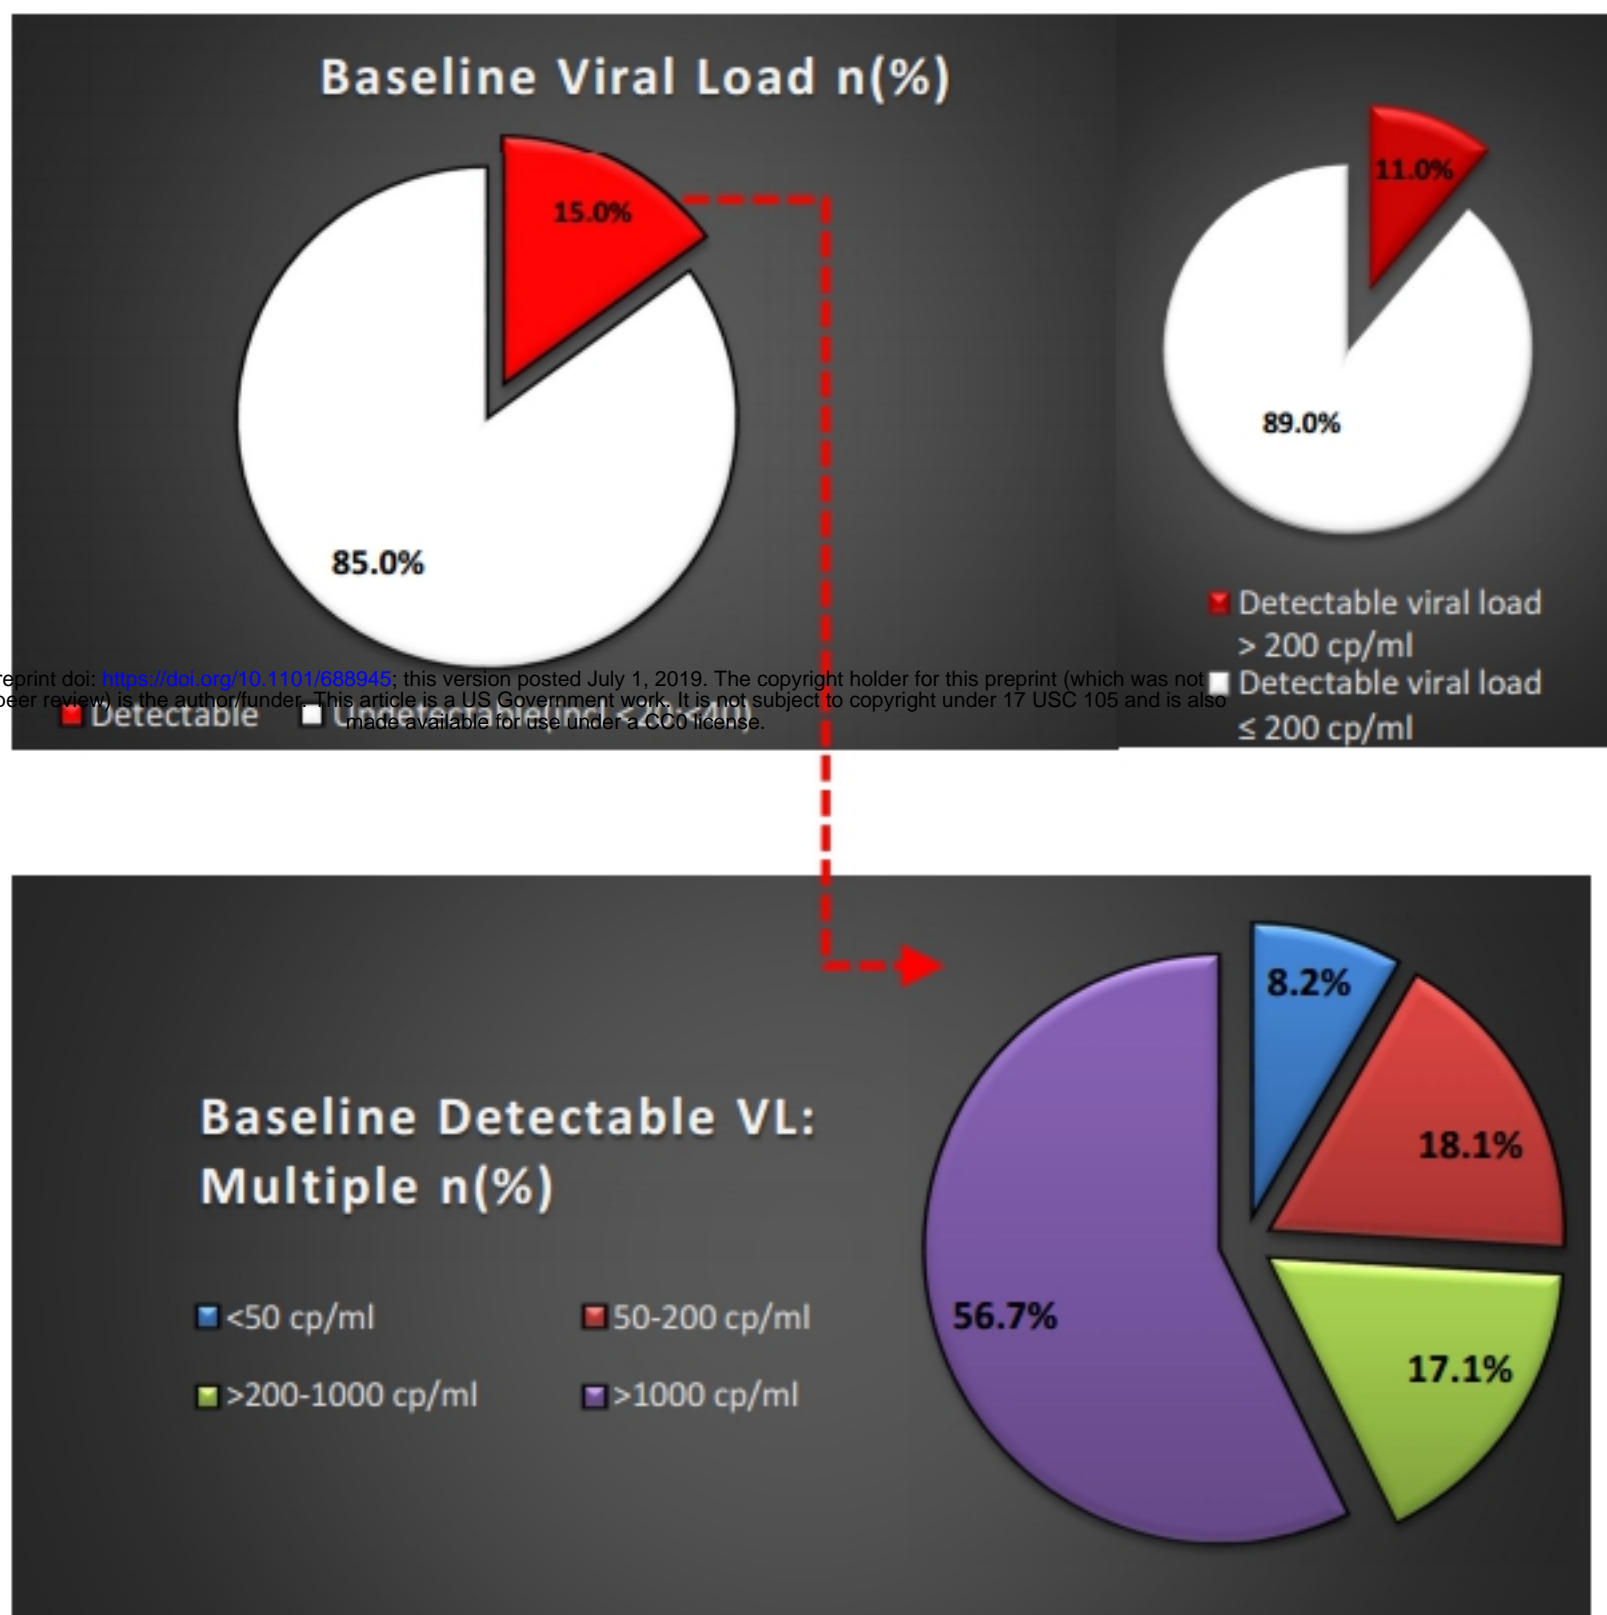

Fig 1. proportion of viral suppression
